# Supplementary material
Source: PubMed Central journal article supplement (PMC3993245)
Supplement: AAC.02370-13_zac005142803so1.pdf [file AAC.02370-13_zac005142803so1.pdf]

1 **Supplementary Tables describing isolates and oligonucleotides used in the study.**

2

3 **Table S1.** Characteristics of *T. vaginalis* isolates used in the study. “+” indicates the presence of

4 the indicated SNP. “ND” indicates not determined. “Mixed” indicates a mixture of  $\geq 0.25$

5 ancestry proportion from both Population #1 and #2.

| Isolate     | Origin            | Metronidazole<br>MLC ( $\mu\text{g/ml}$ ) | Population | <i>tntr4</i><br>C213G | <i>tntr6</i><br>A238T |
|-------------|-------------------|-------------------------------------------|------------|-----------------------|-----------------------|
| MSA 1238    | Charleston, SC    | 0.8                                       | ND         |                       |                       |
| NY 12071    | New York          | 0.8                                       | ND         |                       |                       |
| NY 12260    | New York          | 0.8                                       | ND         |                       |                       |
| NY 12497    | New York          | 0.8                                       | ND         |                       |                       |
| SF-09081101 | San Francisco, CA | 0.8                                       | ND         |                       |                       |
| WA05110911  | Washington        | 0.8                                       | 1          |                       |                       |
| WA07130906  | Washington        | 0.8                                       | 1          |                       |                       |
| PRA-98      | ATCC              | 1 <sup>a</sup>                            | 1          |                       |                       |
| CO-111763   | Colorado          | 1.6                                       | 1          |                       |                       |
| CO-112068   | Colorado          | 1.6                                       | 2          | +                     |                       |
| CO-112362   | Colorado          | 1.6                                       | Mixed      | +                     |                       |
| CO-112435   | Colorado          | 1.6                                       | 1          |                       |                       |
| CO-112673   | Colorado          | 1.6                                       | 2          | +                     |                       |
| CO-113031   | Colorado          | 1.6                                       | 1          |                       |                       |
| CO-113353   | Colorado          | 1.6                                       | 1          |                       |                       |
| CO-114139   | Colorado          | 1.6                                       | 1          |                       |                       |
| NY 11900    | New York          | 1.6                                       | ND         |                       |                       |
| NY 12102    | New York          | 1.6                                       | ND         |                       |                       |
| NY 12107    | New York          | 1.6                                       | ND         |                       |                       |

|             |                   |     |    |   |  |
|-------------|-------------------|-----|----|---|--|
| NY 12487    | New York          | 1.6 | ND |   |  |
| NY 12539    | New York          | 1.6 | ND | + |  |
| SF-09042801 | San Francisco, CA | 1.6 | 1  |   |  |
| SF-09050402 | San Francisco, CA | 1.6 | 1  |   |  |
| SF-09051101 | San Francisco, CA | 1.6 | 1  |   |  |
| SF-09080302 | San Francisco, CA | 1.6 | 1  |   |  |
| SF-09081002 | San Francisco, CA | 1.6 | 1  |   |  |
| SF-09081103 | San Francisco, CA | 1.6 | 1  |   |  |
| WA05110918  | Washington        | 1.6 | 1  |   |  |
| WA06020908  | Washington        | 1.6 | 1  |   |  |
| WA06020910  | Washington        | 1.6 | 1  |   |  |
| WA07130902  | Washington        | 1.6 | 2  | + |  |
| CO-111629   | Colorado          | 3.1 | 1  |   |  |
| CO-111682   | Colorado          | 3.1 | 1  |   |  |
| CO-113632   | Colorado          | 3.1 | 1  |   |  |
| CO-113739   | Colorado          | 3.1 | 2  | + |  |
| LSU 4334    | Baton Rouge, LA   | 3.1 | ND |   |  |
| MSA 1148    | Richmond, VA      | 3.1 | ND | + |  |
| MSA 1248    | Forrestville, MD  | 3.1 | ND |   |  |
| NY 10060906 | New York          | 3.1 | ND |   |  |
| NY 10070903 | New York          | 3.1 | ND |   |  |
| NY 10080904 | New York          | 3.1 | ND |   |  |
| NY 10140901 | New York          | 3.1 | ND |   |  |
| NY 11763    | New York          | 3.1 | ND |   |  |
| NY 11789    | New York          | 3.1 | ND | + |  |
| NY 11790    | New York          | 3.1 | ND | + |  |
| NY 12068    | New York          | 3.1 | ND |   |  |

|             |                   |                |       |   |   |
|-------------|-------------------|----------------|-------|---|---|
| NY 12144    | New York          | 3.1            | ND    | + |   |
| NY 12186    | New York          | 3.1            | ND    | + | + |
| NY 12233    | New York          | 3.1            | ND    |   |   |
| SF-09062401 | San Francisco, CA | 3.1            | 1     |   |   |
| SF-09063001 | San Francisco, CA | 3.1            | 1     |   |   |
| SF-09070801 | San Francisco, CA | 3.1            | 2     | + | + |
| SF-09081102 | San Francisco, CA | 3.1            | ND    |   |   |
| WA06150905  | Washington        | 3.1            | Mixed |   |   |
| CO-112117   | Colorado          | 6.3            | 2     |   |   |
| CO-113328   | Colorado          | 6.3            | 2     |   |   |
| MSA 1175    | Boston, MA        | 6.3            | ND    | + |   |
| MSA 1239    | Richardson, TX    | 6.3            | ND    |   |   |
| NY 10220905 | New York          | 6.3            | ND    | + |   |
| NY 12145    | New York          | 6.3            | ND    | + |   |
| NY 12174    | New York          | 6.3            | ND    | + |   |
| SF-09042701 | San Francisco, CA | 6.3            | 2     | + |   |
| SF-09060901 | San Francisco, CA | 6.3            | 1     |   |   |
| SF-09061501 | San Francisco, CA | 6.3            | 1     |   |   |
| WA05110913  | Washington        | 6.3            | 1     |   |   |
| 30001       | ATCC              | 8 <sup>a</sup> | 1     |   |   |
| CO-112062   | Colorado          | 12.5           | 2     | + |   |
| CO-113124   | Colorado          | 12.5           | 1     |   |   |
| CO-113289   | Colorado          | 12.5           | 2     | + |   |
| CO-113747   | Colorado          | 12.5           | Mixed | + |   |
| MSA 1150    | Indianapolis, IN  | 12.5           | ND    |   |   |
| MSA 1171    | Charlotte, NC     | 12.5           | ND    |   |   |
| MSA 1218    | New Haven, CT     | 12.5           | ND    |   |   |

|             |                   |      |       |    |   |
|-------------|-------------------|------|-------|----|---|
| MSA 1223    | Chapel Hill, NC   | 12.5 | ND    |    |   |
| MSA 1240    | Baltimore, MD     | 12.5 | ND    | +  |   |
| MSA 1245    | Quincy, FL        | 12.5 | ND    | +  |   |
| MSA 1246    | Cookeville, TN    | 12.5 | ND    | +  |   |
| MSA 1249    | Carrolton, GA     | 12.5 | ND    | +  |   |
| MSA 1265    | Frankfort, KY     | 12.5 | ND    | +  |   |
| NY 10060907 | New York          | 12.5 | ND    | +  |   |
| NY 10130902 | New York          | 12.5 | ND    | ND |   |
| NY 12143    | New York          | 12.5 | ND    | +  |   |
| NY 12182    | New York          | 12.5 | ND    | +  |   |
| NY 12188    | New York          | 12.5 | ND    | +  |   |
| NY 12209    | New York          | 12.5 | ND    | +  |   |
| NY 12344    | New York          | 12.5 | ND    | +  |   |
| SF-09060101 | San Francisco, CA | 12.5 | 2     | +  |   |
| SF-09061601 | San Francisco, CA | 12.5 | 2     | +  | + |
| SF-09073001 | San Francisco, CA | 12.5 | 2     | +  |   |
| SF-09081003 | San Francisco, CA | 12.5 | ND    | +  |   |
| CO-113208   | Colorado          | 25   | 2     |    |   |
| CO-113795   | Colorado          | 25   | Mixed | +  |   |
| CO-114154   | Colorado          | 25   | 2     | +  |   |
| MSA 1159    | Hartford, CT      | 25   | ND    | +  |   |
| MSA 1176    | Indianapolis, IN  | 25   | ND    |    |   |
| MSA 1229    | Columbus, OH      | 25   | ND    | +  |   |
| MSA 2055    | Baton Rouge, LA   | 25   | ND    | +  | + |
| NY 11788    | New York          | 25   | ND    | +  |   |
| SF-09081001 | San Francisco, CA | 25   | 2     | +  |   |
| MSA 1157    | Lake Havaso, AZ   | 50   | ND    | +  |   |

|            |                   |                  |    |   |   |
|------------|-------------------|------------------|----|---|---|
| MSA 1160   | Rochester, MN     | 50               | ND |   |   |
| MSA 1164   | Houston, TX       | 50               | ND | + |   |
| MSA 1177   | Minneapolis, MN   | 50               | ND | + |   |
| MSA 1234   | Tallahassee, FL   | 50               | ND |   |   |
| MSA 1244   | Beaverton, OR     | 50               | ND |   |   |
| MSA 1254   | Dade City, FL     | 50               | ND | + |   |
| NY 12498   | New York          | 50               | ND | + |   |
| NY 3241004 | New York          | 50               | ND | + | + |
| 1113       | East Hartford, CT | 100              | 2  | + | + |
| 1133       | Petersburg, VA    | 100              | 2  | + | + |
| 1181       | Liberty, MO       | 100              | 2  | + | + |
| 1219       | Houston, TX       | 100              | 2  | + |   |
| MSA 1041   | Brooklyn, NY      | 100              | ND |   |   |
| MSA 1156   | Los Angeles, CA   | 100              | ND | + |   |
| MSA 1158   | Allentown, PA     | 100              | ND | + |   |
| MSA 1172   | Ashtabula, OH     | 100              | ND | + |   |
| MSA 1221   | Philadelphia, PA  | 100              | ND | + |   |
| MSA 1237   | Great Falls, MT   | 100              | ND | + |   |
| MSA 1247   | Charlotte, NC     | 100              | ND | + |   |
| MSA 1250   | St. Louis, MO     | 100              | ND | + | + |
| MSA 1268   | Chicago, IL       | 100              | ND | + |   |
| 50142      | New York, NY      | 125 <sup>a</sup> | 1  |   |   |
| 50143      | Columbus, OH      | 150 <sup>a</sup> | 2  | + | + |
| 1184       | Ft. Pierce, FL    | 100-200          | 2  | + | + |
| 1110       | Waco, TX          | 200              | 1  |   |   |
| 1115       | Eau Claire, WI    | 200              | 2  | + | + |
| 1116       | Fulton, MO        | 200              | 1  |   |   |

|          |                   |                  |       |   |   |
|----------|-------------------|------------------|-------|---|---|
| 1117     | Atlanta, GA       | 200              | 2     |   |   |
| 1118     | Boston, MA        | 200              | Mixed | + |   |
| 1119     | Galveston, TX     | 200              | 2     | + | + |
| 1124     | Rock Hill, SC     | 200              | Mixed | + |   |
| 1178     | Atlanta, Ga       | 200              | 1     |   |   |
| 1179     | Albany, OR        | 200              | 2     | + |   |
| 1208     | Palos Heights, IL | 200              | 2     |   |   |
| 1216     | New Orleans, LA   | 200              | 2     | + |   |
| MSA 1149 | Greensboro, NC    | 200              | ND    | + | + |
| MSA 1152 | Auckley, IA       | 200              | ND    | + | + |
| MSA 1155 | Dallas, TX        | 200              | ND    | + |   |
| MSA 1174 | Durham, NC        | 200              | ND    | + |   |
| MSA 1226 | Cincinnati, OH    | 200              | ND    |   |   |
| MSA 1227 | Fall River MA     | 200              | ND    | + | + |
| MSA 1236 | New Orleans, LA   | 200              | ND    | + | + |
| MSA 1251 | Plano, TX         | 200              | ND    | + |   |
| MSA 1259 | Lancaster, CA     | 200              | ND    |   |   |
| MSA 1262 | Vestavia, AL      | 200              | ND    |   |   |
| MSA 1263 | Augusta, GA       | 200              | ND    |   |   |
| MSA 1266 | Portland, OR      | 200              | ND    | + | + |
| 50141    | CT                | 200 <sup>a</sup> | 1/2   | + | + |
| 1205     | New York, NY      | 200-400          | 2     | + |   |
| 1222     | Indianapolis, IN  | 200-400          | 2     | + |   |
| 1224     | Seattle, WA       | 200-400          | 2     | + | + |
| 1112     | Dedham, MA        | 400              | 1     |   |   |
| 1122     | Exton, PA         | 400              | 2     | + | + |
| 1130     | Tucson, AZ        | 400              | 2     | + | + |

|          |                        |      |       |   |   |
|----------|------------------------|------|-------|---|---|
| 1131     | Mobile, AL             | 400  | 2     | + |   |
| 1185     | St. Charles, MO        | 400  | Mixed |   |   |
| 1189     | Fall River, MA         | 400  | 1     |   |   |
| 1191     | Arlington, TX          | 400  | 2     | + |   |
| 1200     | Greenville, AL         | 400  | 1     |   |   |
| 1202     | Havre de Grace, MD     | 400  | 2     | + |   |
| 1209     | Houston, TX            | 400  | 2     | + | + |
| 1210     | Jacksonville Beach, FL | 400  | 2     | + |   |
| 1212     | Denver, CO             | 400  | 1     |   |   |
| 1213     | Boone, NC              | 400  | 2     | + |   |
| 1214     | Wichita, KS            | 400  | 2     | + |   |
| 1215     | Charlotte, NC          | 400  | 1     |   |   |
| 1217     | Baltimore MD           | 400  | 2     | + |   |
| 1220     | Lincoln, NE            | 400  | 2     | + | + |
| MSA 1154 | Richmond, CA           | 400  | ND    |   |   |
| MSA 1162 | Chicago, IL            | 400  | ND    | + |   |
| MSA 1235 | Indianapolis, IN       | 400  | ND    | + |   |
| MSA 1252 | San Diego, CA          | 400  | ND    | + | + |
| MSA 1253 | Lincoln, Illinois      | 400  | ND    |   |   |
| MSA 1255 | Loveland, CO           | 400  | ND    | + | + |
| MSA 1258 | Stone Mountain, GA     | 400  | ND    | + | + |
| MSA 1260 | West Chester, OH       | 400  | ND    |   |   |
| MSA 1261 | Killen, TX             | 400  | ND    | + |   |
| 1107     | Asheville, NC          | >400 | Mixed |   | + |
| 1109     | Mora, MN               | >400 | 2     | + | + |
| 1121     | Flowood, MS            | >400 | 1     |   |   |
| 1123     | Richmond, VA           | >400 | 2     | + | + |

|           |                    |      |    |    |    |
|-----------|--------------------|------|----|----|----|
| 1126      | Brunswick, GA      | >400 | 2  | +  |    |
| 1188      | Charleston, SC     | >400 | 1  |    |    |
| 1190      | Maitland, FL       | >400 | 1  |    | ND |
| 1192      | St. Louis, MO      | >400 | 2  | +  | +  |
| 1201      | Gallup, NM         | >400 | 2  | +  | +  |
| 1203      | Hampton, VA        | >400 | 1  |    |    |
| 1225      | Evergreen Park, IL | >400 | 2  | +  | +  |
| MSA 1165  | Dearborn, MI       | >400 | ND | +  |    |
| MSA 1228  | New Iberia, LA     | >400 | ND | +  | +  |
| MSA 1230  | Springfield, MO    | >400 | ND |    |    |
| MSA 12302 | Atlanta, GA        | >400 | ND |    |    |
| MSA 12303 | Monroe, LA         | >400 | ND | +  | +  |
| MSA 1231  | Dallas, TX         | >400 | ND |    | +  |
| MSA 1241  | Brunswick, ME      | >400 | ND | +  |    |
| MSA 1243  | Manchester, CT     | >400 | ND | +  |    |
| MSA 1256  | Cleveland, OH      | >400 | ND |    |    |
| MSA 1257  | West Chester, OH   | >400 | ND | ND |    |
| MSA 1264  | Cedar Park, TX     | >400 | ND | +  |    |
| MSA 1269  | Surprise, AZ       | >400 | ND | +  | +  |

6

7 <sup>a</sup> Values found in reference (1).

8

9

10

11

12

13



14 **Table S2.** Oligonucleotides used in the study. **Table S2.** Oligonucleotides used in the study.

| Oligonucleotide     | GenBank Accession #                                     | Sequence                    | Orientation | Amplicon Size (bp) |
|---------------------|---------------------------------------------------------|-----------------------------|-------------|--------------------|
| ODH484              | EAX85619 ( <i>tntr1</i> ) <sup>a</sup> ORF              | ATGGCAATTTCTGCTATCGAAGCT    | Forward     | 540                |
| ODH485              | EAX85619 ( <i>tntr1</i> ) <sup>a</sup> ORF              | TTATTCATATAAAAAATCTTTCT     | Reverse     |                    |
| ODH570              | EAX89456 ( <i>tntr2</i> ) <sup>a</sup> 200 bp 5' of ORF | CCAAAGGCACAAATAAACAAATTTT   | Forward     | 594                |
| ODH571              | EAX89456 ( <i>tntr2</i> ) <sup>a</sup> 200 bp 3' of ORF | TCTATACAAATTATGAACCATCAT    | Reverse     |                    |
| ODH488              | EAX89567 ( <i>tntr3</i> ) <sup>a</sup> ORF              | ATGAGTGTTCACAGTGCATCCAA     | Forward     | 549                |
| ODH489              | EAX89567 ( <i>tntr3</i> ) <sup>a</sup> ORF              | TTAGTCAATATGAGTAATCTTTCC    | Reverse     |                    |
| ODH490              | EAX94976 ( <i>tntr4</i> ) <sup>a</sup> ORF              | ATGAGTGTCTTAAGTGCATCCAA     | Forward     | 549                |
| ODH491              | EAX94976 ( <i>tntr4</i> ) <sup>a</sup> ORF              | TTAGTCGGCATAAACTACCTTAGA    | Reverse     |                    |
| ODH572              | EAX96000 ( <i>tntr5</i> ) <sup>a</sup> 200 bp 5' of ORF | AAGGAATAAGATGAAATAATAAAA    | Forward     | 943                |
| ODH573              | EAX96000 ( <i>tntr5</i> ) <sup>a</sup> 200 bp 3' of ORF | TTGGATATAGATATCCGCAGAAAT    | Reverse     |                    |
| ODH528              | EAX95789 ( <i>tntr6</i> ) <sup>a</sup> 200 bp 5' of ORF | CATTGAATTTATCGTICAAAATT     | Forward     | 743                |
| ODH495              | EAX95789 ( <i>tntr6</i> ) <sup>a</sup> ORF              | TTATTC AATGTA TGTAACCTTTCT  | Reverse     |                    |
| ODH496              | EAY04224 ( <i>tntr7</i> ) <sup>a</sup> ORF              | ATGTTTGACGC AATCAAAGAAAGA   | Forward     | 516                |
| ODH497              | EAY04224 ( <i>tntr7</i> ) <sup>a</sup> ORF              | TCAGTGAATCTTGGATGTGATTC     | Reverse     |                    |
| ODH498              | EAY05392 ( <i>tntr8</i> ) <sup>a</sup> ORF              | ATGGCTCTTGCGGCTCTCAAACAT    | Forward     | 546                |
| ODH499              | EAY05392 ( <i>tntr8</i> ) <sup>a</sup> ORF              | TTACTCTGGAACGAACTGAACCTT    | Reverse     |                    |
| ODH500              | EAY15872 ( <i>tntr9</i> ) <sup>a</sup> ORF              | ATGAACGTGCTTGATGCGATTICT    | Forward     | 546                |
| ODH501              | EAY15872 ( <i>tntr9</i> ) <sup>a</sup> ORF              | TCATTCATAAAATGATGCCTTGCA    | Reverse     |                    |
| ODH502              | EAY16021 ( <i>tntr10</i> ) <sup>a</sup> ORF             | ATGGCTCTTGAAGTCCTTAAGGCA    | Forward     | 543                |
| ODH503              | EAY16021 ( <i>tntr10</i> ) <sup>a</sup> ORF             | TTATTC AAGGAA TGTAAC TTTACG | Reverse     |                    |
| ODH504              | EAY14310 ( <i>tntr11</i> ) <sup>a</sup> ORF             | ATGACAAGCGTGTGTAATGTATA     | Forward     | 549                |
| ODH505              | EAY14310 ( <i>tntr11</i> ) <sup>a</sup> ORF             | TTATTCATGTATGTGGCTTTGCA     | Reverse     |                    |
| ODH904              | EAX94976 ( <i>tntr4</i> )                               | GTCAGAGGCCAAGAAAAGCTTGCC    | Forward     | 130                |
| ODH905              | EAX94976 ( <i>tntr4</i> )                               | GAGCATCGCAGGTGATAACGTTC     | Reverse     |                    |
| ODH906 <sup>b</sup> | EAX94976 ( <i>tntr4</i> ) wild-type                     | CCTTCCAGAATACGCCACAAAGTAC   | Forward     |                    |
| ODH907 <sup>c</sup> | EAX94976 ( <i>tntr4</i> ) C213G                         | CCTTCCAGAATAGGCCACAAAGTAC   | Forward     |                    |
| ODH631              | EAX95789 ( <i>tntr6</i> )                               | CGTTGTTACAAAC AAGGAAAAACTCC | Forward     | 173                |
| ODH632              | EAX95789 ( <i>tntr6</i> )                               | GGATGCACGCTCATICTTGA        | Reverse     |                    |
| ODH641 <sup>b</sup> | EAX95789 ( <i>tntr6</i> ) wild-type                     | GCTTCCCTTGATGAGAAGTCTCAAC   | Forward     |                    |
| ODH578 <sup>d</sup> | EAX95789 ( <i>tntr6</i> ) A238T                         | TGGAATGCAATAGCAGACACATGT    | Forward     |                    |

|                     |          |                       |         |     |
|---------------------|----------|-----------------------|---------|-----|
| ODH689 <sup>e</sup> | EAY02351 | CGTCAACATCGGTGGCTTCA  | Forward | 489 |
| ODH690 <sup>e</sup> | EAY02351 | GCGACAGCGACGACATTCAT  | Reverse |     |
| ODH691 <sup>e</sup> | EAX82426 | GTGCCATTAC AACAGCATCG | Forward | 451 |
| ODH692 <sup>e</sup> | EAX82426 | CCAAGTATAGCTCCGCTGAC  | Reverse |     |
| ODH693 <sup>e</sup> | EAY10832 | GAACAGGAGCACCAGCAGAA  | Forward | 412 |
| ODH694 <sup>e</sup> | EAY10832 | TCTCTAGCAACGCAGCCAAC  | Reverse |     |
| ODH695 <sup>e</sup> | EAY03282 | TCGTCCAGGATGGTGCTTT   | Forward | 494 |
| ODH696 <sup>e</sup> | EAY03282 | ACGCCTTCCCTTCATCTT    | Reverse |     |
| ODH697 <sup>e</sup> | EAX88709 | TCATCGGCCAATGGAACCAA  | Forward | 491 |
| ODH698 <sup>e</sup> | EAX88709 | TCCGTGCGGACAATCCAAG   | Reverse |     |
| ODH699 <sup>e</sup> | EAY10370 | GCTGAGTGACGGTGGACATT  | Forward | 449 |
| ODH700 <sup>e</sup> | EAY10370 | GAAGATGAGGTCCTCCTTGA  | Reverse |     |
| ODH701 <sup>e</sup> | EAY13510 | AGCCAGTTGGCTTCTGAGTT  | Forward | 459 |
| ODH702 <sup>e</sup> | EAY13510 | AACAATTCCGCAAGCTGGAG  | Reverse |     |

15

16 <sup>a</sup> Gene nomenclature (*tvntr*) is found in reference (2).

17 <sup>b</sup> TaqMan<sup>®</sup> probe containing a 5' Cy5 fluorophore and 3' Black Hole Quencher-2.

18 <sup>c</sup> TaqMan<sup>®</sup> probe containing a 5' FAM fluorophore and 3' Black Hole Quencher-1.

19 <sup>d</sup> TaqMan<sup>®</sup> probe containing a 5' FAM fluorophore and 3' Black Hole Quencher-2.

20 <sup>e</sup> Primer sequences originally found in reference (3).

21

22

23

24

25

26

27

28

29

30 **References**

31

32 1. **Cornelius, D. C., L. Mena, W. B. Lushbaugh, and J. C. Meade.** 2010. Genetic  
33 relatedness of *Trichomonas vaginalis* reference and clinical isolates. *Am J Trop Med Hyg*  
34 **83**:1283-6.

35 2. **Pal, D., S. Banerjee, J. Cui, A. Schwartz, S. K. Ghosh, and J. Samuelson.** 2009.  
36 *Giardia*, *Entamoeba*, and *Trichomonas* enzymes activate metronidazole (nitroreductases)  
37 and inactivate metronidazole (nitroimidazole reductases). *Antimicrob Agents Chemother*  
38 **53**:458-64.

39 3. **Cornelius, D. C., D. A. Robinson, C. A. Muzny, L. A. Mena, D. M. Aanensen, W. B.**  
40 **Lushbaugh, and J. C. Meade.** 2012. Genetic characterization of *Trichomonas vaginalis*  
41 isolates by use of multilocus sequence typing. *J Clin Microbiol* **50**:3293-300.

42

43
